# Supplementary material for: Native top-down proteomics reveals EGFR–ERα signaling crosstalk in breast cancer cells dissociates NUTF2 dimers to modulate ERα signaling and cell growth
Source: Research Square preprint supplement (doi:10.21203/rs.3.rs-3097806/v1), 2023-07-24
Supplement: Supplementary file 1 [file 908bee262ee43922f8e73e79.xlsx]

## Sheet: Complexoforms
Protein Assembly	Metal Cofactor	Protein Name	Accession Number	Modification	Observed Average Mass (Da)	Theoretical Average Mass (Da)	∆ Mass (Da)
Monomer	Mg2+	Prothymosin alpha	P06454-2	N-Terminal acetylation	12008.9	12009	-0.14
Monomer	Ca2+	Prothymosin alpha	P06454-2	N-Terminal acetylation	12024.8	12024.8	0.01
Monomer	Mn2+	Prothymosin alpha	P06454-2	N-Terminal acetylation	12039.8	12039.6	0.12
Monomer	Mn2+, Mg2+	Prothymosin alpha	P06454-2	N-Terminal acetylation	12064	12063.9	0.11
Monomer	Mn2+, Ca2+	Prothymosin alpha	P06454-2	N-Terminal acetylation	12079.8	12079.7	0.11
Monomer	Zn2+, Mg2+, Ca2+	Prothymosin alpha	P06454-2	N-Terminal acetylation	12114.5	12114.5	0
Monomer	Mg2+	Profilin-1	P07737	N-Terminal acetylation	14989.5	14989.4	0.14
Monomer	Ca2+	Profilin-1	P07737	N-Terminal acetylation	15005.5	15005.2	0.31
Homodimer		Heme-binding protein 2	Q9Y5Z4-1	N-Terminal Acetylation	45572.4	45572.6	-0.12
Heterodimer		Heme-binding protein 2	Q9Y5Z4-1	3 acetylations	45614.4	45614.6	-0.16
Dimer		Heme-binding protein 2	Q9Y5Z4-1	4 acetylations	45656.4	45656.6	-0.2
Heterodimer		Heme-binding protein 2	Q9Y5Z4-1	5 acetylations	45698.4	45698.7	-0.24
Homodimer		Calmodulin-1	P0DP23	N-Terminal Acetylation	33497.6	33496.9	0.74
Monomer	Mg2+	Calmodulin-1	P0DP23	N-Terminal Acetylation	16772.7	16772.7	-0.02
Monomer	Ca2+	Calmodulin-1	P0DP23	N-Terminal Acetylation	16788.9	16788.5	0.36
Homodimer	Mg2+	Calmodulin-1	P0DP23	N-Terminal Acetylation	33545.4	33545.5	-0.04
Homodimer	Ca2+	Calmodulin-1	P0DP23	N-Terminal Acetylation	33577.7	33577	0.72
Homotetramer	Ca2+	Calmodulin-1	P0DP23	N-Terminal Acetylation	67155.5	67154	1.44
Homotrimer	Ca2+	Calmodulin-1	P0DP23	N-Terminal Acetylation	50366.6	50365.5	1.08
Homotrimer		D-dopachrome decarboxylase	P30046-1		37741.9	37741.7	0.15
Homotrimer		D-dopachrome decarboxylase	P30046-1	Truncation (-Glycine)	37570.8	37570.6	0.24
Homodimer	Cu2+, Zn2+	Superoxide dismutase [Cu-Zn]	P00441	N-Terminal Acetylation, dissulfide bond (C57-C111)	31947.3	31947	0.3
Homodimer	Cu2+, Zn2+	Superoxide dismutase [Cu-Zn]	P00441	N-Terminal Acetylation	31951.3	31951.1	0.26
Homodimer	Cu2+, Zn2+	Superoxide dismutase [Cu-Zn]	P00441	N-Terminal Acetylation, methylation	31979.4	31979.1	0.24
Homodimer	Cu2+, Zn2+	Superoxide dismutase [Cu-Zn]	P00441	N-Terminal Acetylation, dissulfide bond (C57-C111), methylation	31975.3	31975.1	0.2
Homodimer		Protein S100-A11	P31949	N-Terminal Acetylation	23303.7	23302.6	1.1
Homotrimer		Protein S100-A11	P31949	N-Terminal Acetylation	34955.5	34953.9	1.65
Homotetramer		Protein S100-A11	P31949	N-Terminal Acetylation	46607.4	46605.2	2.2
Homopentamer		Protein S100-A11	P31949	N-Terminal Acetylation	58259.2	58256.4	2.75
Homohexamer		Protein S100-A11	P31949	N-Terminal Acetylation	69911	69907.7	3.3
Homodimer	Ca2+	Protein S100-A11	P31949	N-Terminal Acetylation	23383.6	23382.7	0.82
Homotrimer	Ca2+	Protein S100-A11	P31949	N-Terminal Acetylation	35075.3	35074.1	1.23
Homotetramer	Ca2+	Protein S100-A11	P31949	N-Terminal Acetylation	46767.1	46765.5	1.64
Homodimer		Nuclear transport factor 2	P61970	unmodified subunit + unmodified subunit	28694.1	28694.6	-0.44
Heterodimer		Nuclear transport factor 2	P61970	unmodified subunit + K4 methylation subunit	28708.1	28708.6	-0.53
Heterodimer		Nuclear transport factor 2	P61970	unmodified subunit + K4 acetylation subunit	28736.9	28736.6	0.32
Homodimer		Nuclear transport factor 2	P61970	K4 Acetylation	28778	28778.7	-0.66
Homodimer		Nuclear transport factor 2	P61970	K4 Acetylation, K55 methylation	28807.7	28806.7	0.96
Heterodimer		Nuclear transport factor 2	P61970	K4 and K63 acetylations (subunit) + K4 methylation, K55 methylation (subunit)	28807.6	28806.7	0.92
Heterodimer		Nuclear transport factor 2	P61970	K4 and K63 acetylations (subunit) + K4 dimethylation (subunit)	28807.6	28806.7	0.93
Heterodimer		Nuclear transport factor 2	P61970	K4 and K63 acetylations (subunit) + K4 acetylation (subunit)	28821.7	28820.7	0.959
Heterodimer		Nuclear transport factor 2	P61970	K4 and K63 acetylations (subunit) + K4 acetylation, K55 methylation (subunit)	28835.6	28834.7	0.9
Heterodimer		Nuclear transport factor 2	P61970	K4 and K63 acetylations (subunit) + K4 acetylation, K55 dimethylation (subunit)	28849.7	28848.8	0.918
Heterodimer		Nuclear transport factor 2	P61970	K4 and K63 acetylations (subunit) + K4 acetylation, K55 methylation, K63 acetylation (subunit)	28877.2	28876.8	0.43
Heterotrimer	Cu2+, Zn2+	1 subunit (nuclear transport factor 2) +1 subunit (Superoxide dismutase [Cu-Zn]) + 1 subunit (D-dopachrome decarboxylase)	P61970, P00441, P30046-1	N-terminal and K4 acetylations	42946.2	42945.4	0.79
Heterodimer	Cu2+, Zn2+	1 subunit (nuclear transport factor 2) + 1 subunit (Superoxide dismutase [Cu-Zn])	P61970, P00441	N-terminal and K4 acetylations	30365.7	30364.9	0.79
Heterotetramer	Cu2+, Zn2+	2 subunits (nuclear transport factor 2) + 2 subunits (Superoxide dismutase [Cu-Zn])	P61970, P00441	N-terminal and K4 acetylations	60731.3	60729.7	1.58
Heterotrimer	Cu2+, Zn2+	1 subunit (nuclear transport factor 2) + 2 subunits (Superoxide dismutase [Cu-Zn])	P61970, P00441	N-terminal and K4 acetylations	46341.3	46340.2	1.12
Heterotrimer	Cu2+, Zn2+	2 subunits (nuclear transport factor 2) + 1 subunit (Superoxide dismutase [Cu-Zn])	P61970, P00441	N-terminal and K4 acetylations	44755.6	44754.2	1.45
Heterotrimer	Cu2+, Zn2+	1 subunit (nuclear transport factor 2) +1 subunit (Superoxide dismutase [Cu-Zn]) + 1 subunit (D-dopachrome decarboxylase)	P61970, P00441, P30046-1	N-terminal and K4 acetylations, dissulfide bond (C57-C111)	42944.2	42943.4	0.81
Heterodimer	Cu2+, Zn2+	1 subunit (nuclear transport factor 2) + 1 subunit (Superoxide dismutase [Cu-Zn])	P61970, P00441	N-terminal and K4 acetylations, dissulfide bond (C57-C111)	30363.6	30362.8	0.72
Heterotetramer	Cu2+, Zn2+	2 subunits (nuclear transport factor 2) + 2 subunits (Superoxide dismutase [Cu-Zn])	P61970, P00441	N-terminal and K4 acetylations, dissulfide bond (C57-C111)	60727.3	60725.7	1.62
Heterotrimer	Cu2+, Zn2+	1 subunit (nuclear transport factor 2) + 2 subunits (Superoxide dismutase [Cu-Zn])	P61970, P00441	N-terminal and K4 acetylations, dissulfide bond (C57-C111)	46337.3	46336.3	0.96
Heterotrimer	Cu2+, Zn2+	2 subunits (nuclear transport factor 2) + 1 subunit (Superoxide dismutase [Cu-Zn])	P61970, P00441	N-terminal and K4 acetylations, dissulfide bond (C57-C111)	44753.6	44752.2	1.47
Heterodimer		1 subunit (nuclear transport factor 2) + 1 subunit (D-dopachrome decarboxylase)	P61970, P30046-1	K4 acetylations (nuclear transport factor 2)	26970.6	26969.9	0.66
Heteropentamer		2 subunits (nuclear transport factor 2) + 3 subunits (D-dopachrome decarboxylase)	P61970, P30046-1	K4 acetylations (nuclear transport factor 2)	66521.7	66520.4	1.32
Heterotetramer		1 subunit (nuclear transport factor 2) + 3 subunits (D-dopachrome decarboxylase)	P61970, P30046-1	K4 acetylations (nuclear transport factor 2)	52131.7	52131	0.66
Heterotrimer		2 subunits (nuclear transport factor 2) + 1 subunit (D-dopachrome decarboxylase)	P61970, P30046-1	K4 acetylations (nuclear transport factor 2)	41360.6	41359.2	1.32
Heterotetramer		2 subunits (nuclear transport factor 2) + 2 subunit (D-dopachrome decarboxylase)	P61970, P30046-1	K4 acetylations (nuclear transport factor 2)	53941.1	53939.8	1.32
Homodimer		Parathymosin	P20962	N-terminus acetylation	22880.3	22881.5	-1.16
Homotrimer		Parathymosin	P20962	N-terminus acetylation	34320.5	34322.2	-1.74
Homotetramer		Parathymosin	P20962	N-terminus acetylation	45760.7	45763	-2.32
Homohexamer		Parathymosin	P20962	N-terminus acetylation	68641	68644.5	-3.48
Homotrimer		Parathymosin	P20962	N-terminus acetylation, K3 acetylation	34446.1	34448.4	-2.28
Homotetramer		Parathymosin	P20962	N-terminus acetylation, K3 acetylation	45928.1	45931.2	-3.04
Homopentamer		Parathymosin	P20962	N-terminus acetylation, K3 acetylation	57410.4	57413.9	-3.5
Homodimer		Parathymosin	P20962		22796.3	22797.4	-1.08
Homotrimer		Parathymosin	P20962		34194.5	34196.1	-1.62
Homotetramer		Parathymosin	P20962		45592.7	45594.8	-2.16
Homohexamer		Parathymosin	P20962		68389	68392.3	-3.24
Heterotrimer		Parathymosin	P20962	N-Terminus acetylation, K3 acetylation (subunit)+ N-terminus acetylation(subunit) + unmodified suubnit	34320.4	34322.2	-1.825
Heterodimer		Parathymosin	P20962	N-terminus, K3 acetylation (subunit)+unmodified (subunit)	22880.3	22881.5	-1.248
Homodimer		Hepatoma-derived growth factor	P51858-1		53315.5	53314.2	1.34
Homodimer		Hepatoma-derived growth factor	P51858-1	N-terminal acetylation	53399.4	53398.3	1.12
Heterodimer		Hepatoma-derived growth factor	P51858-1	N-terminal acetylation (subunit) + unmodifed (subunit)	53357.4	53356.2	1.23
Heterodimer		Hepatoma-derived growth factor	P51858-1	S205 phosphorylation (subunit) + unmodified (subunit)	53475.4	53474.1	1.31
Heterodimer		Hepatoma-derived growth factor	P51858-1	S205 phosphorylation (subunit) + N-terminal acetylation (subunit)	53436.4	53436.2	0.151
Heterodimer		Hepatoma-derived growth factor	P51858-1	N-terminal acetylation, K43 acetylation (subunit) + N-terminal acetylation (subunit)	53441.4	53440.3	1.08
Hetrodimer		Hepatoma-derived growth factor	P51858-1	N-terminal acetylation, S106 phosphorylation (subunit)+unmodified	53437.4	53436.2	1.16
Homodimer		Triosephosphate isomerase	P60174-1		53077.4	53076.6	0.76
Homodimer		Triosephosphate isomerase	P60174-1	N15 deamidation, N71 deamidation	53081.4	53080.5	0.88
Heterodimer		Triosephosphate isomerase	P60174-1	N15 deamidation, N71 deamidation (subunit)+unmodofied (subunit)	53079.4	53078.6	0.82
Homodimer		Triosephosphate isomerase	P60174-1	Phosphorylated subunit	53236.3	53236.6	-0.3
Heterodimer		Triosephosphate isomerase	P60174-1	Phosphorylated subunit + unmodified (subunit)	53156.8	53156.6	0.23
Heterodimer		Triosephosphate isomerase	P60174-1	Phosphorylation (subunit)+ N15 deamidation, N71 deamidation (subunit)	53159.1	53158.5	0.51
Homodimer		Triosephosphate isomerase	P60174-1	K13 Acetylation, E104D	53133.2	53132.6	0.58
Homodimer		Triosephosphate isomerase	P60174-1	N15 deamidation, N71 deamidation, E104D	53053.3	53052.5	0.86
Heterodimer		Triosephosphate isomerase	P60174-1	E104D (subunit) + K13 Acetylation, E104D (subunit)	53091.3	53090.9	0.4
Heterodimer		Triosephosphate isomerase	P60174-1	E104D (subunit) + N15 deamidation, N71 deamidation, E104D (subunit)	53051.3	53050.5	0.83
Heterodimer		Triosephosphate isomerase	P60174-1	E104D (subunit)+unmodofied (subunit)	53063.3	53062.6	0.78
Heterodimer		Triosephosphate isomerase	P60174-1	E104D (subunit)+ N15 deamidation, N71 deamidation (subunit)	53065.4	53064.5	0.84
Heterodimer		Triosephosphate isomerase	P60174-1	E104D (subunit)+ phosphorylation (subunit)	53143	53142.6	0.47
Heterodimer		Triosephosphate isomerase	P60174-1	N15 deamidation, N71 deamidation, E104D (subunit) + unmodofied (subunit)	53065.3	53064.5	0.81
Heterodimer		Triosephosphate isomerase	P60174-1	N15 deamidation, N71 deamidation, E104D (subunit) + N15 deamidation, N71 deamidation (subunit)	53067.4	53066.5	0.87
Heterodimer		Triosephosphate isomerase	P60174-1	N15 deamidation, N71 deamidation, E104D (subunit) + phosphorylation (subunit)	53145	53144.5	0.5
Heterodimer		Triosephosphate isomerase	P60174-1	Truncation (uncharacterized)	52911.5
Heterodimer		Triosephosphate isomerase	P60174-1	Truncation (uncharacterized)	52971.7
Homodimer		14-3-3 protein zeta/delta	P63104-1	N-terminus acetylation	55575.4	55574.3	1.08
Homotrimer		Macrophage migration inhibitory factor	P14174		37035.5	37035.3	0.18
Heterotrimer		Macrophage migration inhibitory factor	P14174	K77 acetylation subunit + 2 unmodified subunits	37077.4	37077.4	0.07
Heterotrimer		Macrophage migration inhibitory factor	P14174	C80 nitrosylation subunit + 2 unmodified subunits	37064.5	37064.4	0.01
Heterotrimer		Macrophage migration inhibitory factor	P14174	K77 acetylation (subunit) + 1 nitrosylation (subunit) + 1 nitrosylation (subunit)	37135.3	37135.4	-0.03
Homotrimer		Macrophage migration inhibitory factor	P14174	K77 acetylation (subunit) + K77 acetylation (subunit) + K77 acetylation (subunit)	37161.3	37161.4	-0.15
Heterotrimer		Macrophage migration inhibitory factor	P14174	Y36 phosphorylation subunit+acetylated subunit + unmodified subunit	37157.3	37157.3	-0.03
Heterotrimer		Macrophage migration inhibitory factor	P14174	Y36 phosphorylion subunit+K77 acetylation subunit + C80 nitrosylation subunit	37186.3	37186.3	-0.08
Heterotrimer		Macrophage migration inhibitory factor	P14174	Y36 phosphorylion subunit+Y36 phosphorylion subunit + unmodified subunit	37195.3	37195.3	-0.02
Homotrimer		Macrophage migration inhibitory factor	P14174	Truncation (uncharacterized)	36941.5
Homodimer		Macrophage migration inhibitory factor	P14174		24690.4	24690.2	0.14
Homotrimer		Phosphatidylethanolamine-binding protein 1	P30086		62776.9	62776.8	0.09
Monomer	Ca2+	Phosphatidylethanolamine-binding protein 1	P30086		20965.7	20965.7	0.02
Homodimer		Cofilin-1	P23528	N-terminus acetylation	36827.2	36826.7	0.5
Homodimer		Thymosin beta-4	P62328	N-terminus acetylation	9926.94	9927	-0.06
Heterotrimer		2 subunits (Macrophage migration inhibitory factor) + 1 subunit (D-dopachrome decarboxylase)	P14175, P30046-1		37271	37270.8	0.17
Heterotrimer		1 subunit (Macrophage migration inhibitory factor) + 2 suunits (D-dopachrome decarboxylase)	P14175, P30046-1		37506.4	37506.2	0.16
Homodimer		Calmodulin-3	P0DP23	N-terminus acetylation	33553.6	33553	0.66
Monomer	Ca2+	Calmodulin-3	P0DP23	N-terminus acetylation	16816.7	16816.6	0.11
Homodimer	Ca2+	Calmodulin-3	P0DP23	N-terminus acetylation	33633.4	33633.1	0.22
Heterodimer	Ca2+	Calmodulin-3	P0DP23	N-terminus acetylation	33593.4	33593.1	0.32
Homotetramer		Calmodulin-3	P0DP23	N-Terminal acetylation	67107.3	67106	1.32
Heterotrimer	Cu2+, Zn2+	2 subunits (Superoxide dismutase [Cu-Zn]) + 1 subunit (D-dopachrome decarboxylase)	P00441, P30046-1	N-Terminal Acetylation, dissulfide bond (C57-C111)	44527.9	44527.6	0.35
Heteropentamer	Cu2+, Zn2+	2 subunits (Superoxide dismutase [Cu-Zn]) + 3 subunit (D-dopachrome decarboxylase)	P00441, P30046-1	N-Terminal Acetylation, dissulfide bond (C57-C111)	69689.2	69688.7	0.45

## Sheet: Proteoforms of the Complexes
Metal Cofactor	Protein Name	Accession Number	Modification	Observed Average Mass (Da)	Theoretical Average Mass (Da)	∆ Mass (Da)	P-score	Matching Ions
Mg2+	Prothymosin alpha	P06454-2	N-Terminal acetylation	12008.9	12009	-0.14	1.9e-21	80
Mg2+	Profilin-1	P07737	N-Terminal acetylation	14989.5	14989.4	0.14	1.5e-09	55
Ca2+	Profilin-1	P07737	N-Terminal acetylation	15005.5	15005.2	0.31	5e-14	67
	Heme-binding protein 2	Q9Y5Z4-1	N-Terminal Acetylation	22786.2	22786.3	-0.06	4.9e-16	21
	Calmodulin-1	P0DP23	N-Terminal Acetylation	16748	16748.4	-0.4003	2.3e-14	18
Mg2+	Calmodulin-1	P0DP23	N-Terminal Acetylation	16772.7	16772.7	-0.02	2.3e-14	18
Ca2+	Calmodulin-1	P0DP23	N-Terminal Acetylation	16788.9	16788.5	0.36	2.3e-14	18
	D-dopachrome decarboxylase	P30046-1		12580.7	12580.6	0.15	1.8e-07	7
Cu2+, Zn2+	Superoxide dismutase [Cu-Zn]	P00441	N-Terminal Acetylation, dissulfide bond (C57-C111), methylation	15987.6	15987.5	0.1	9.9e-08	104
Cu2+, Zn2+	Superoxide dismutase [Cu-Zn]	P00441	N-Terminal Acetylation, methylation	15989.7	15989.6	0.12	4.9e-07	100
Cu2+, Zn2+	Superoxide dismutase [Cu-Zn]	P00441	N-Terminal Acetylation, dissulfide bond (C57-C111)	15973.7	15973.5	0.15	7.9e-09	110
Cu2+, Zn2+	Superoxide dismutase [Cu-Zn]	P00441	N-Terminal Acetylation	15975.5	15975.7	-0.128	1.1e-06	103
	Protein S100-A11	P31949	N-Terminal Acetylation	11651.8	11651.3	0.55	2.4e-23	34
Ca2+	Protein S100-A11	P31949	N-Terminal Acetylation	11691.8	11691.4	0.41	2.4e-23	34
	Nuclear transport factor 2	P61970	unmodified form	14347.8	14347.3	0.5047	6.5e-09	35
	Nuclear transport factor 2	P61970	K4 methylation	14361.8	14361.3	0.4962	4.3e-11	39
	Nuclear transport factor 2	P61970	K4 methylation, K55 methylation	14375.8	14375.4	0.4906	3.2e-12	49
	Nuclear transport factor 2	P61970	K4 dimethylation	14375.8	14375.3	0.5006	3.5e-22	57
	Nuclear transport factor 2	P61970	K4 Acetylation	14389.9	14389.3	0.529	8.1e-22	64
	Nuclear transport factor 2	P61970	K4 Acetylation, K55 methylation	14403.8	14403.4	0.4752	8e-24	70
	Nuclear transport factor 2	P61970	K4 acetylation, K55 dimethylation	14417.9	14417.4	0.4884	1.1e-11	48
	Nuclear transport factor 2	P61970	K4 and K63 acetylations	14431.8	14431.4	0.4276	1.2e-10	45
	Parathymosin	P20962	N-terminus acetylation	11440.2	11440.8	-0.58	1.4e-53	55
	Parathymosin	P20962	N-terminus acetylation, K4 acetylation	11482.1	11482.8	-0.705	7.5e-16	22
	Parathymosin	P20962		11398.2	11398.7	-0.543	3.2e-16	24
	Hepatoma-derived growth factor	P51858-1		26657.8	26657.1	0.6741	5.4e-19	22
	Hepatoma-derived growth factor	P51858-1	N-terminal acetylation	26699.7	26699.1	0.558	1.1e-22	25
	Hepatoma-derived growth factor	P51858-1	S205 phosphorylation	26737.7	26737.1	0.6551	3.7e-16	20
	Triosephosphate isomerase	P60174-1		26538.7	26538.3	0.38	5.3e-56	56
	Triosephosphate isomerase	P60174-1	N15 deamidation, N71 deamidation	26540.7	26540.3	0.44	9.7e-11	126
	Triosephosphate isomerase	P60174-1	K13 Acetylation, E104D	26566.6	26566.3	0.29	2.9e-06	45
	Triosephosphate isomerase	P60174-1	N15 deamidation, N71 deamidation, E104D	26526.7	26526.2	0.43	1.8e-18	70
	Triosephosphate isomerase	P60174-1	E104D	26524.7	26524.3	0.4	1e-11	57
	14-3-3 protein zeta/delta	P63104-1	N-terminus acetylation	27787.7	27787.1	0.5363	4.4e-16	21
	Macrophage migration inhibitory factor	P14174		12345.2	12345.1	0.0679	8.1e-49	52
	Macrophage migration inhibitory factor	P14174	K77 acetylation	12387.1	12387.1	-0.07	9.6e-28	35
	Macrophage migration inhibitory factor	P14174	C80 nitrosylation	12374.2	12374.1	0.05	8.6e-07	89
	Macrophage migration inhibitory factor	P14174	Y36 phosphorylation	12425.1	12425.1	-0.0389	3.3e-10	86
	Phosphatidylethanolamine-binding protein 1	P30086		20925.6	20925.6	0.03	2.5e-20	26
	Cofilin-1	P23528	N-terminus acetylation	18413.6	18413.3	0.2522	2.2e-15	20
	Thymosin beta-4	P62328	N-terminus acetylation	4963.47	4963.5	-0.03	1.9e-64	34
	Calmodulin-3	P0DP23	N-terminus acetylation	16776.8	16776.5	0.33	1.1e-27	27
Ca2+	Calmodulin-3	P0DP23	N-terminus acetylation	16816.7	16816.6	0.11	1.5e-09	41
